# Supplementary material
Source: PubMed Central journal article supplement (PMC7985816)

## Supplementary Online Content

DeMartino P, Haag MB, Hersh AR, Caughey AB, Roth JA. A budget impact analysis of gene therapy for sickle cell disease: the Medicaid perspective. *JAMA Pediatr*. Published online March 22, 2021. doi:10.1001/jamapediatrics.2020.7140

**eFigure 1.** Flow Diagram of the Analytic Framework

**eTable.** Disease Burden Among Medicaid Enrollees

**eFigure 2.** Standard vs Annuity Payment Model: PMPM for all US Medicaid Programs in Aggregate

**eFigure 3.** Standard vs Annuity Payment Model: PMPM for Alabama

**eFigure 4.** Standard vs Annuity Payment Model: PMPM for Washington, DC

**eFigure 5.** Standard vs Annuity Payment Model: PMPM for Florida

**eFigure 6.** Standard vs Annuity Payment Model: PMPM for Georgia

**eFigure 7.** Standard vs Annuity Payment Model: PMPM for Louisiana

**eFigure 8.** Standard vs Annuity Payment Model: PMPM for Maryland

**eFigure 9.** Standard vs Annuity Payment Model: PMPM for Mississippi

**eFigure 10.** Standard vs Annuity Payment Model: PMPM for North Carolina

**eFigure 11.** Standard vs Annuity Payment Model: PMPM for South Carolina

**eFigure 12.** Standard vs Annuity Payment Model: PMPM for Virginia

This supplementary material has been provided by the authors to give readers additional information about their work.

**eFigure 1.** Flow Diagram of the Analytic Framework

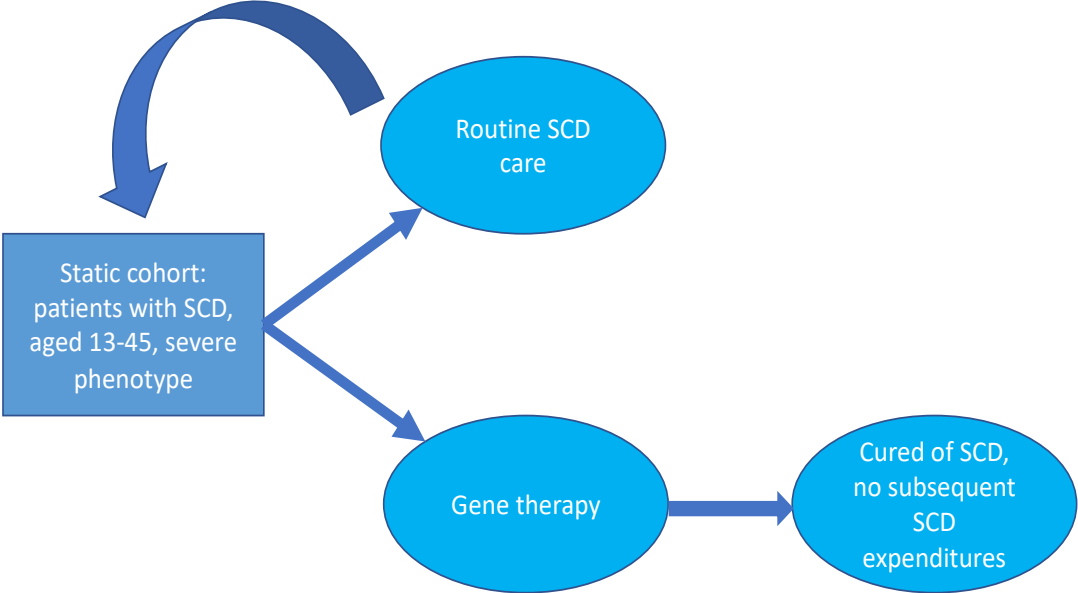

**eTable.** Disease Burden Among Medicaid Enrollees

| Parameter                                                     | United States | Alabama | District of Columbia | Florida   | Georgia   | Louisiana | Maryland  | Mississippi | North Carolina | South Carolina | Virginia  |
|---------------------------------------------------------------|---------------|---------|----------------------|-----------|-----------|-----------|-----------|-------------|----------------|----------------|-----------|
| Total Medicaid Enrollment <sup>a</sup>                        | 73,642,979    | 902,197 | 262,096              | 3,800,552 | 1,818,600 | 1,459,238 | 1,325,225 | 645,271     | 1,784,003      | 1,038,602      | 1,030,996 |
| Medicaid population with SCD, aged 13-45 <sup>a</sup>         | 29,143        | 971     | 235                  | 2,777     | 1,881     | 1,304     | 907       | 979         | 1,386          | 1,084          | 814       |
| Medicaid population with SCD, severe, aged 13-45 <sup>b</sup> | 5,464         | 182     | 44                   | 521       | 353       | 245       | 170       | 184         | 260            | 203            | 153       |

a) 2012 enrollment data<sup>13</sup>. b) Excluded SC genotype (25% of SCD) and assumed 25% patients with SCD having severe phenotype

**eFigure 2.** Standard vs Annuity Payment Model: PMPM for all US Medicaid Programs in Aggregate

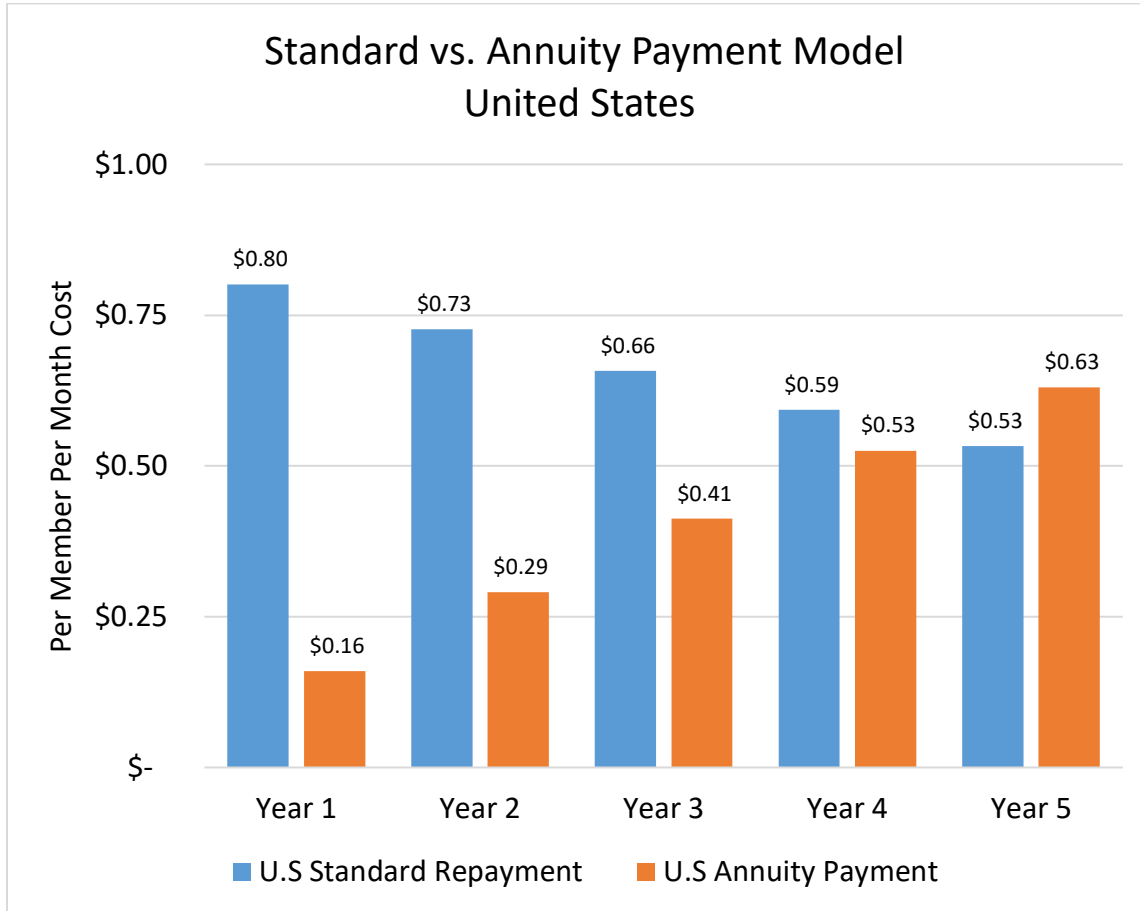

**eFigure 3.** Standard vs Annuity Payment Model: PMPM for Alabama

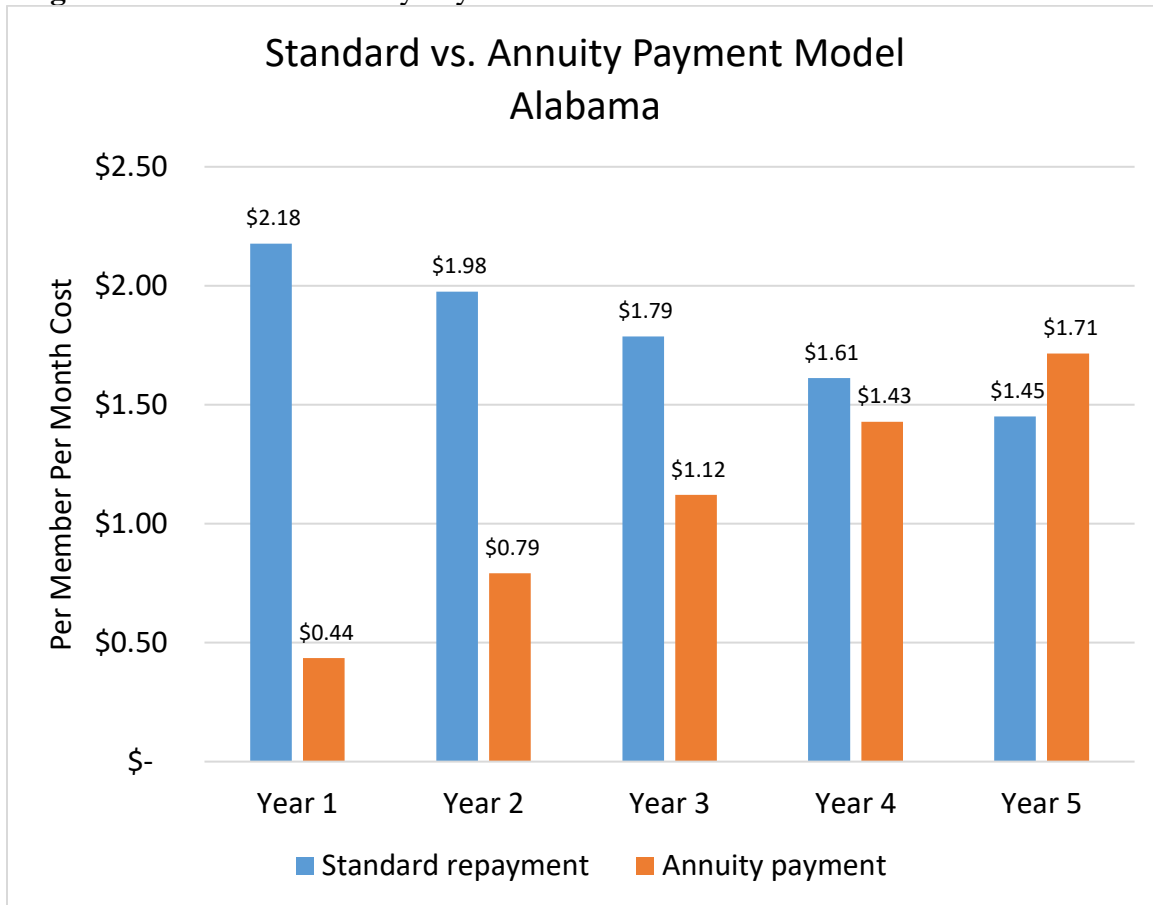

**eFigure 4.** Standard vs Annuity Payment Model: PMPM for Washington, DC

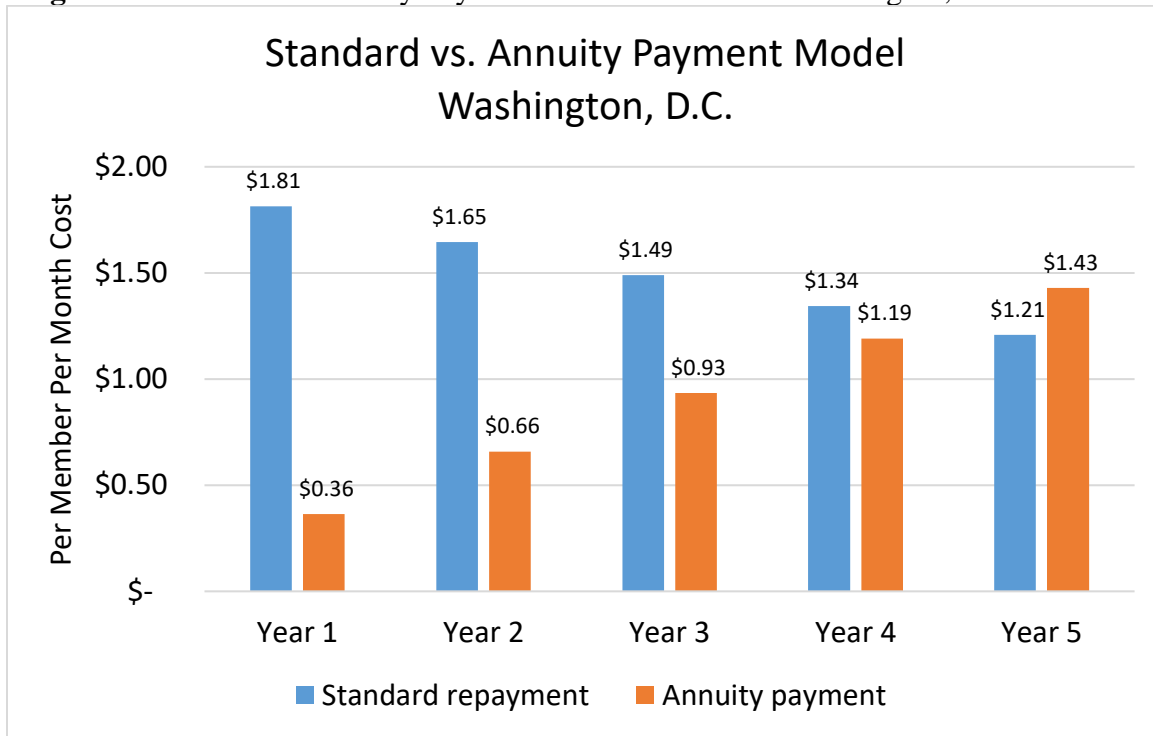

**eFigure 5.** Standard vs Annuity Payment Model: PMPM for Florida

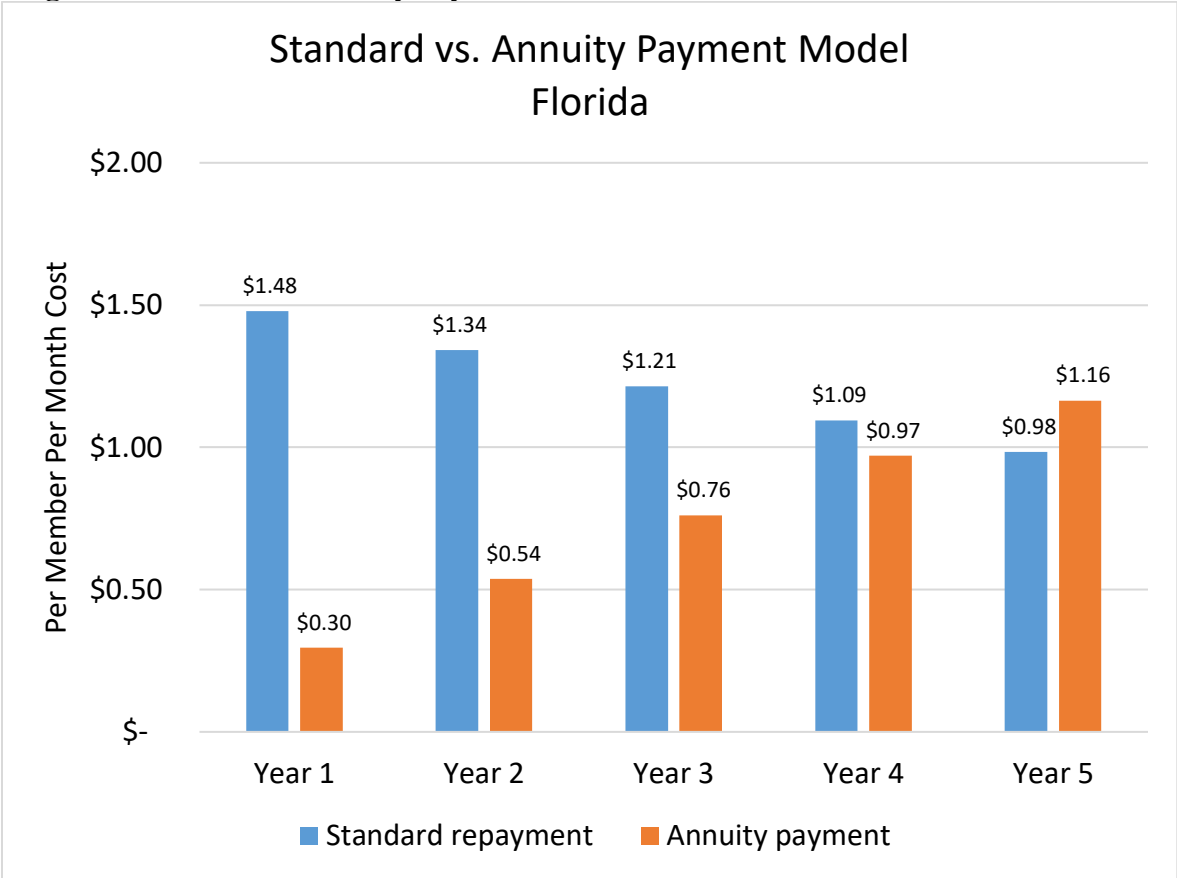

**eFigure 6.** Standard vs Annuity Payment Model: PMPM for Georgia

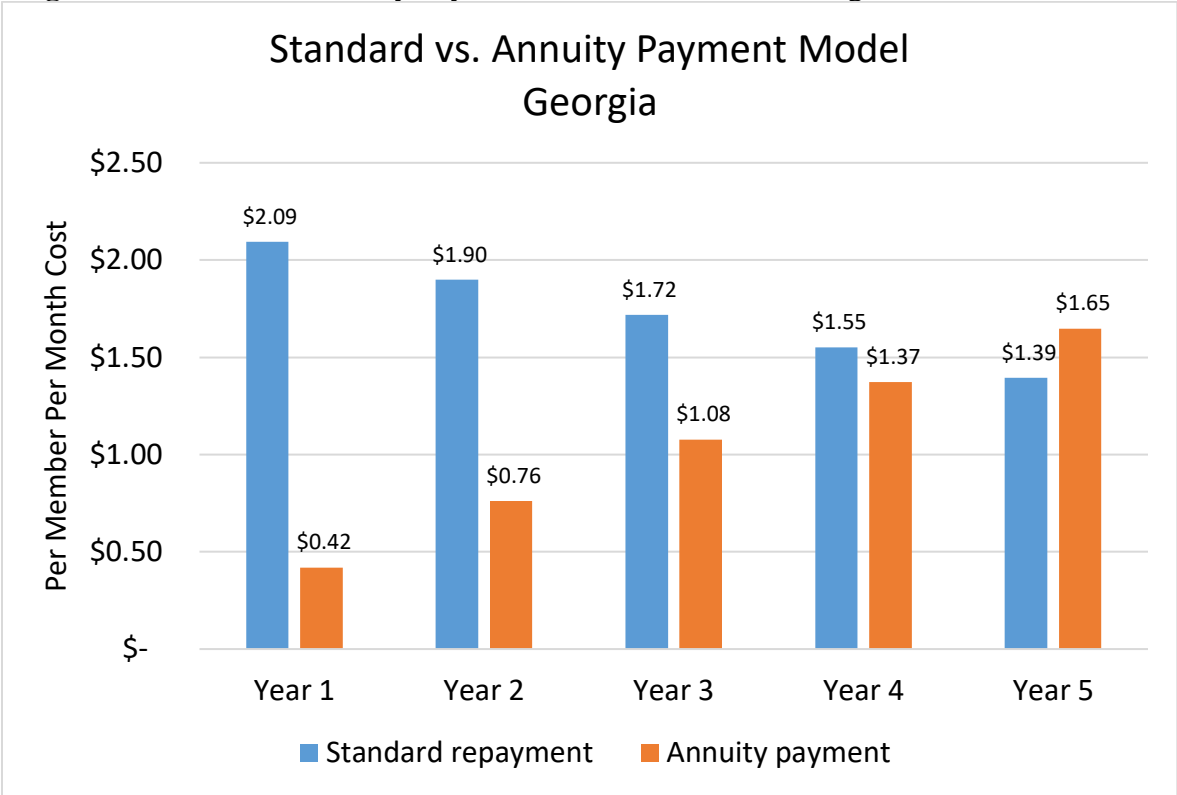



**eFigure 7.** Standard vs Annuity Payment Model: PMPM for Louisiana

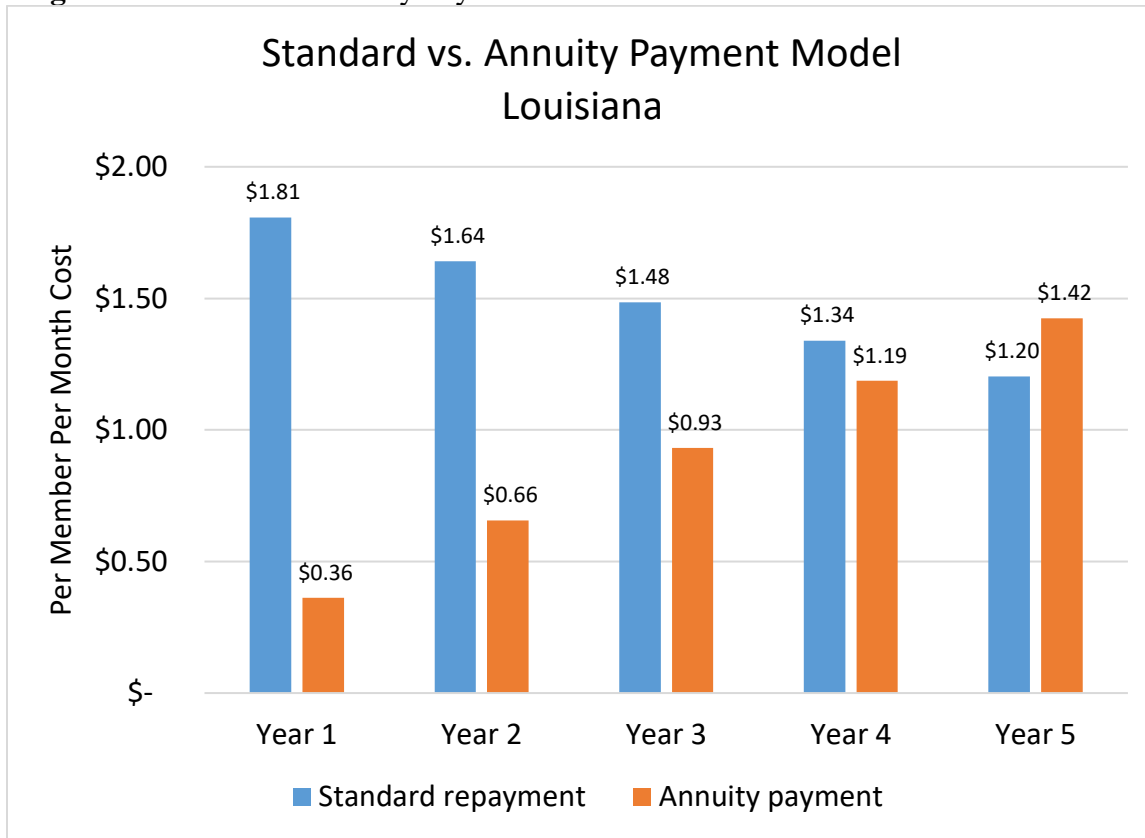

**eFigure 8.** Standard vs Annuity Payment Model: PMPM for Maryland

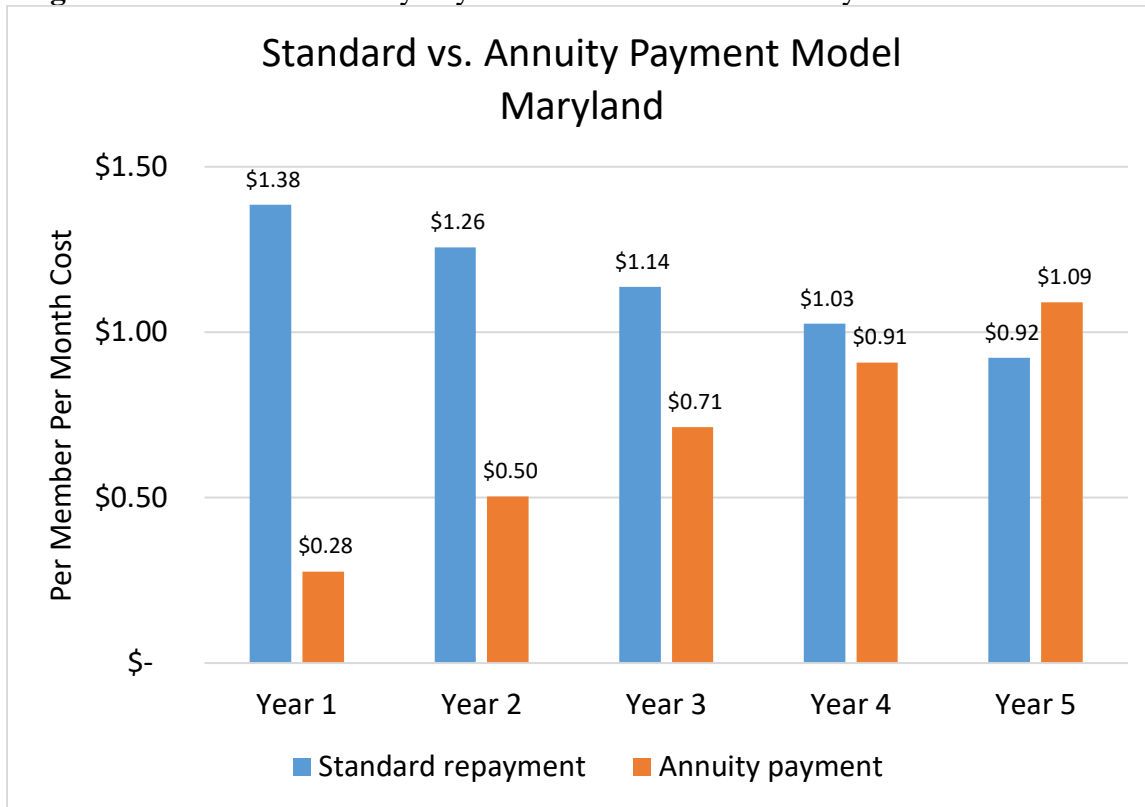

**eFigure 9.** Standard vs Annuity Payment Model: PMPM for Mississippi

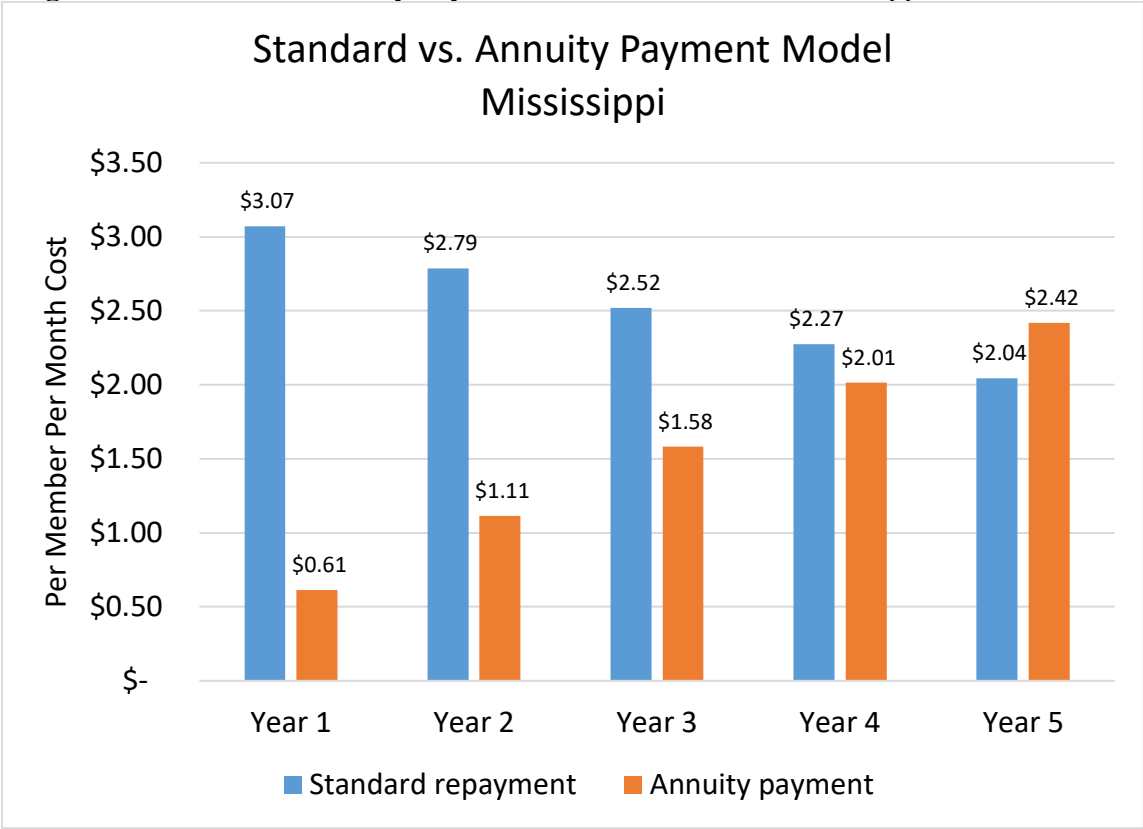

**eFigure 10.** Standard vs Annuity Payment Model: PMPM for North Carolina

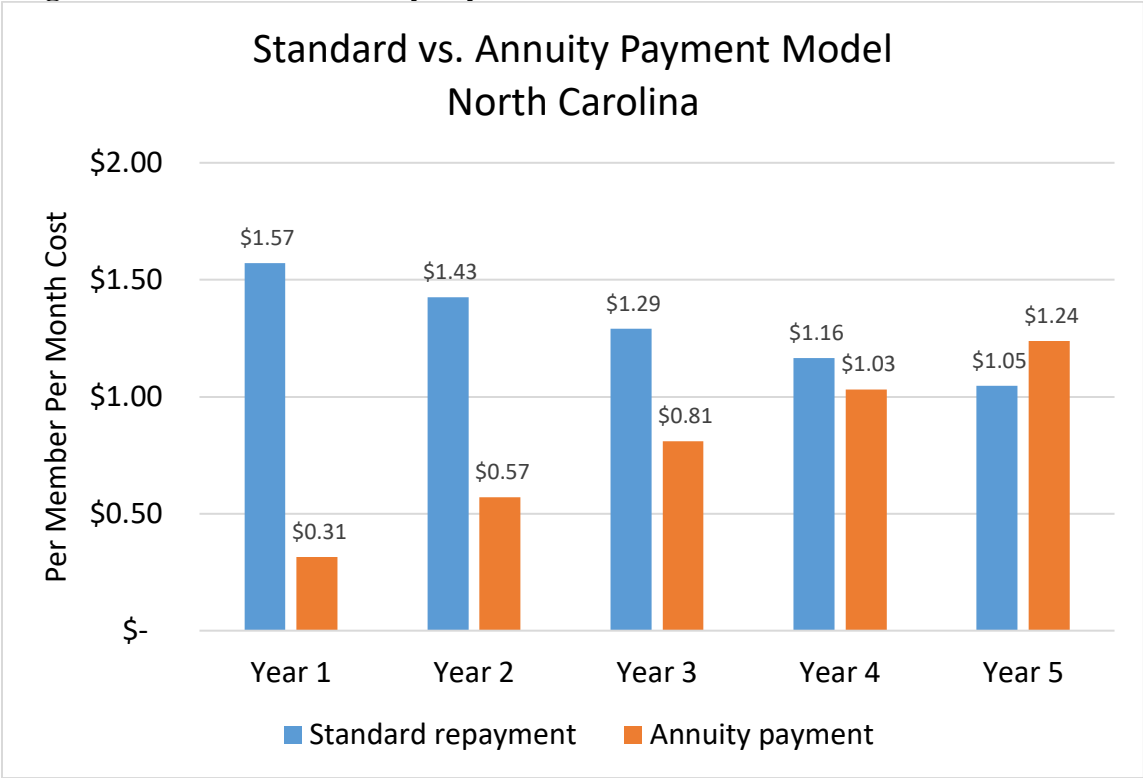

**eFigure 11.** Standard vs Annuity Payment Model: PMPM for South Carolina

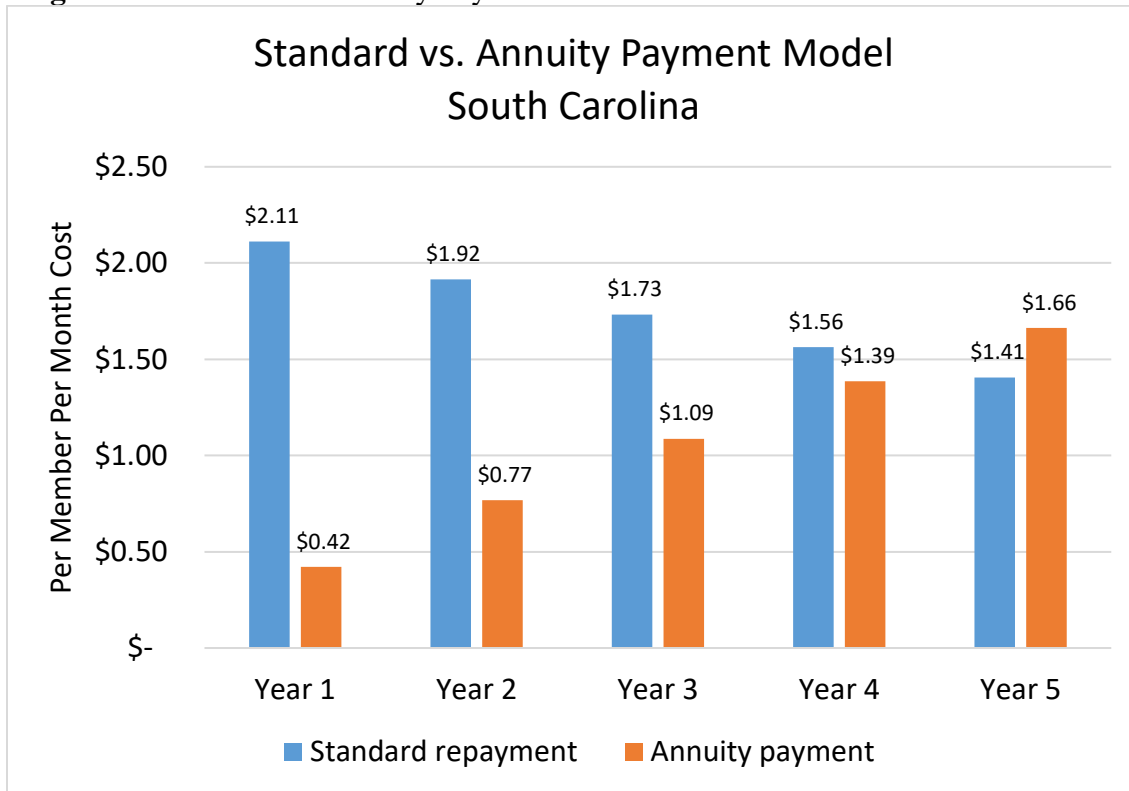

**eFigure 12.** Standard vs Annuity Payment Model: PMPM for Virginia

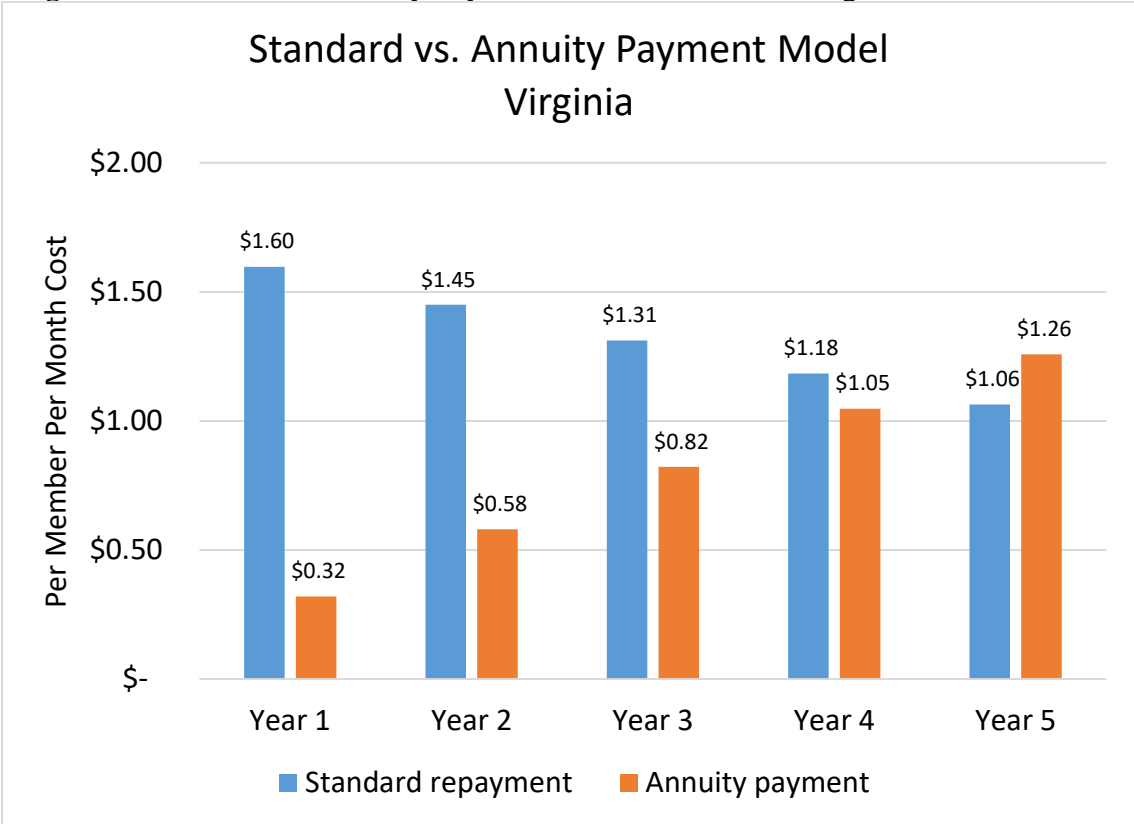

Supplement: jamapediatr-e207140-s001.pdf [file jamapediatr-e207140-s001.pdf]
